# Supplementary material for: Piperazinium-mediated crosslinked polyimide-polydimethylsiloxane (PI-PDMS) copolymer membranes: the effect of PDMS content on CO2 separation
Source: Royal Society of Chemistry journal article supplement (doi:10.1039/c7ra10949k), 2018-01-01
Supplement: c7ra10949k1.pdf [file c7ra10949k1.pdf]

*Supporting Information for*

**Piperazinium-mediated crosslinked polyimide-polydimethylsiloxane  
(PI-PDMS) copolymer membranes: the effect of PDMS content on  
CO<sub>2</sub> separation**

**Hyelim You,<sup>a,b</sup> Iqbal Hossain<sup>a,b</sup> and Tae-Hyun Kim<sup>a,b,\*</sup>**

*<sup>a</sup>Organic Material Synthesis Laboratory, Department of Chemistry,*

*<sup>b</sup>Research Institute of Basic Sciences,*

*Incheon National University, Incheon, 406-772, Korea*

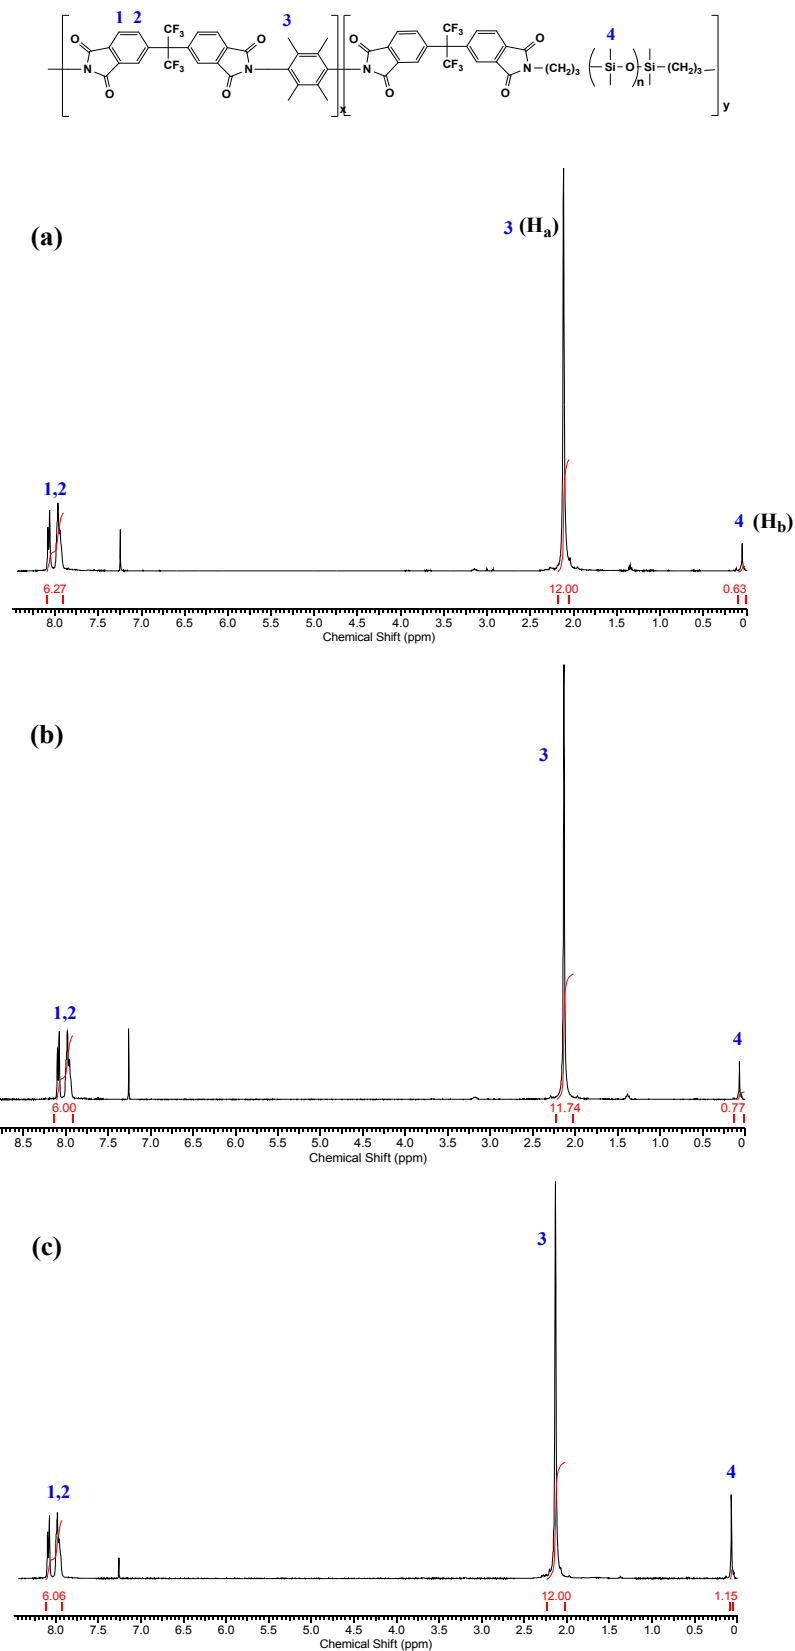

**Figure S1.** <sup>1</sup>H NMR spectra of PI-PDMS-0.05 (a), PI-PDMS-0.10 (b) and PI-PDMS-0.15 (c)

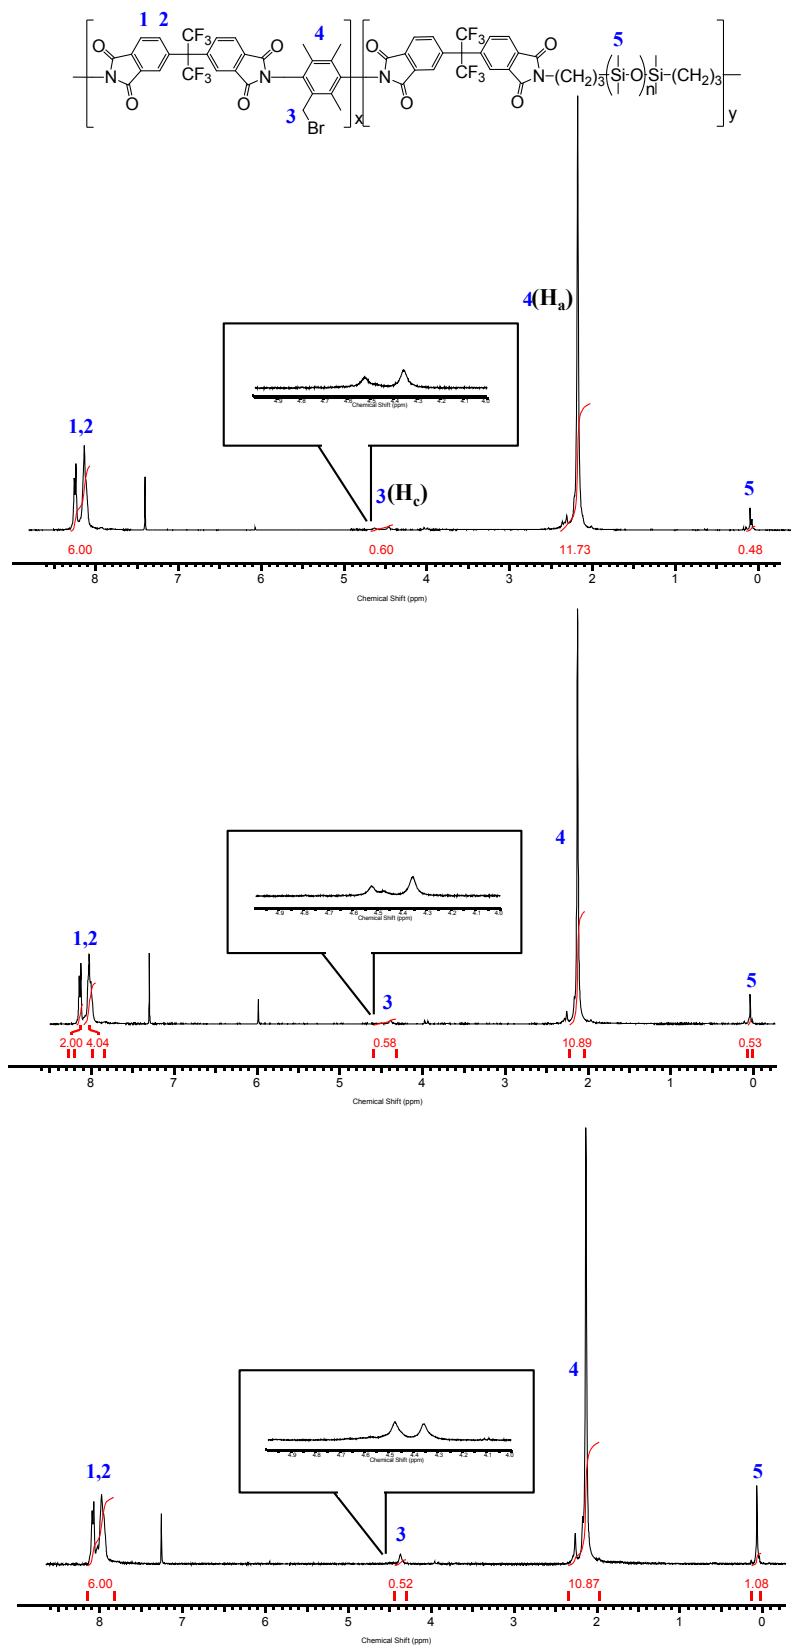

**Figure S2.**  $^1\text{H}$  NMR spectra of Br-PI-PDMS-0.05 (a), Br-PI-PDMS-0.10 (b) and Br-PI-PDMS-0.15 (c)

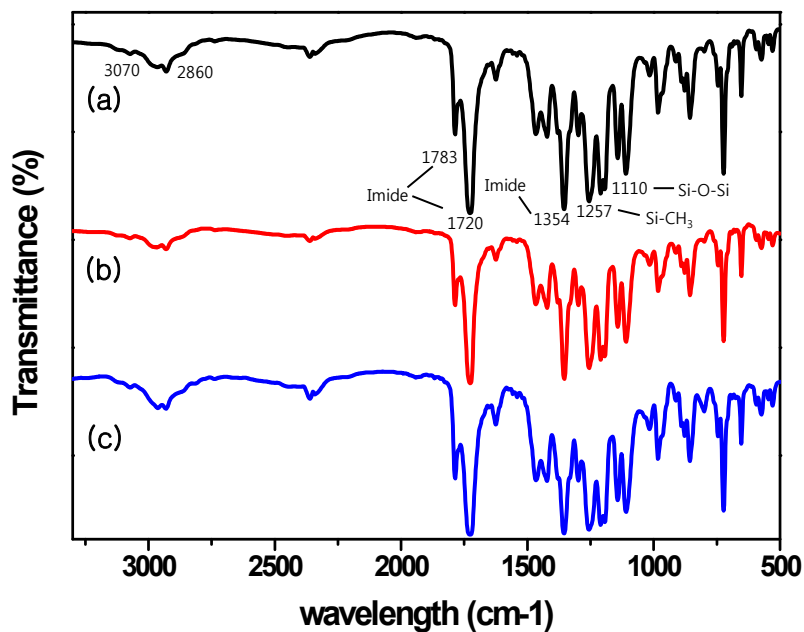

**Figure S3.** FT-IR spectra (500-3500 $\text{cm}^{-1}$ ) of the [xPI-PDMS-0.05][Br] (a), [xPI-PDMS-0.10][Br] (b) and [xPI-PDMS-0.15][Br] (c)

**Table S1.** Gas diffusivity coefficients<sup>a</sup> and solubility coefficients<sup>b</sup> at 2 atm and 30 °C

| Membrane            | $D_{\text{CO}_2}$ | $D_{\text{N}_2}$ | $D_{\text{CH}_4}$ | $D_{\text{CO}_2/\text{N}_2}$ | $D_{\text{CO}_2/\text{CH}_4}$ | $S_{\text{CO}_2}$ | $S_{\text{N}_2}$ | $S_{\text{CH}_4}$ | $S_{\text{CO}_2/\text{N}_2}$ | $S_{\text{CO}_2/\text{CH}_4}$ |
|---------------------|-------------------|------------------|-------------------|------------------------------|-------------------------------|-------------------|------------------|-------------------|------------------------------|-------------------------------|
| [xPI-PDMS-0.05][Br] | 13.1              | 10.1             | 1.62              | 1.30                         | 8.09                          | 0.47              | 0.03             | 0.12              | 13.59                        | 3.90                          |
| [xPI-PDMS-0.10][Br] | 17.0              | 13.4             | 1.49              | 1.29                         | 11.41                         | 0.47              | 0.04             | 0.14              | 12.34                        | 3.16                          |
| [xPI-PDMS-0.15][Br] | 9.62              | 7.38             | 0.82              | 1.30                         | 11.73                         | 0.39              | 0.03             | 0.13              | 13.87                        | 3.03                          |

<sup>a</sup>Diffusivity coefficient ( $10^{-8} \text{ cm}^2/\text{s}$ ) <sup>b</sup>Solubility coefficient ( $\text{cm}^3 \text{ (STP)}/\text{cm}^3 \text{ cmHg}$ )

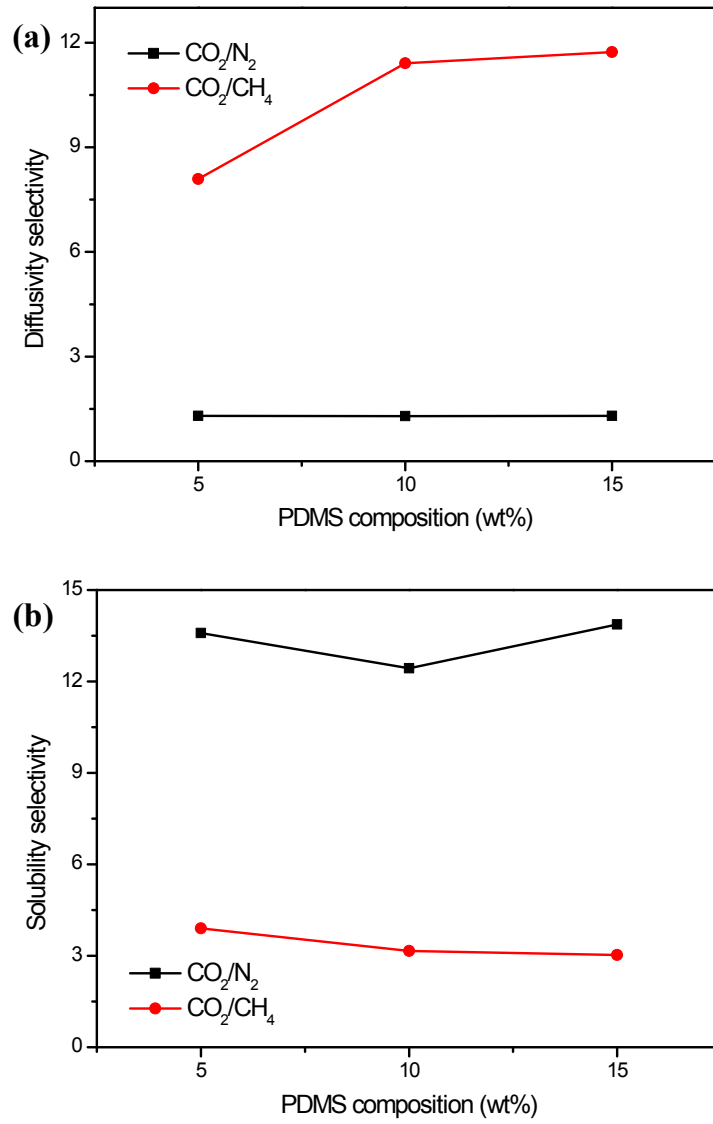

**Figure S4.** Diffusivity selectivity (a) and solubility selectivity of the [xPI-PDMS][Br] membranes as a function of the PDMS content

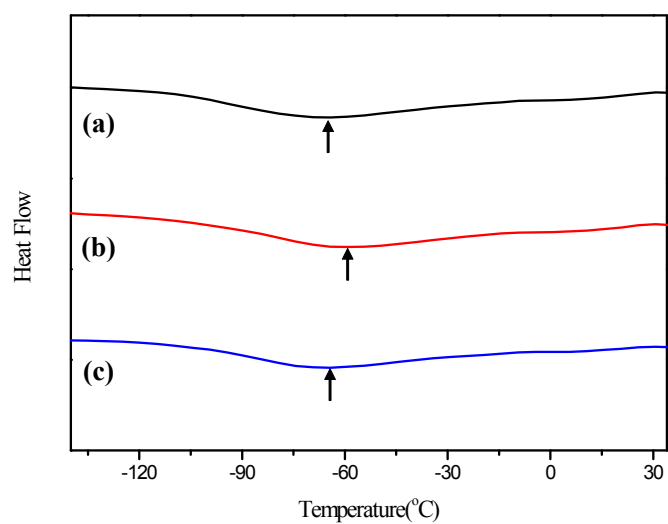

**Figure S5.** DSC plots of the [xPI-PDMS-0.05][Br] (a), [xPI-PDMS-0.10][Br] (b) and [xPI-PDMS-0.15][Br] (c) membranes

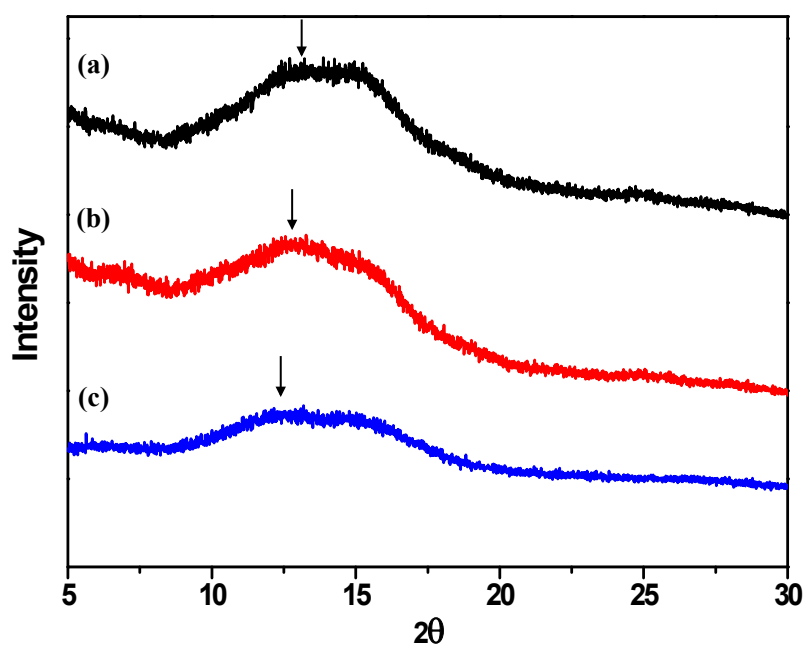

**Figure S6.** Wide-angle X-ray diffraction plots of the [xPI-PDMS-0.05][Br] (a), [xPI-PDMS-0.10][Br] (b) and [xPI-PDMS-0.15][Br] (c) membranes.

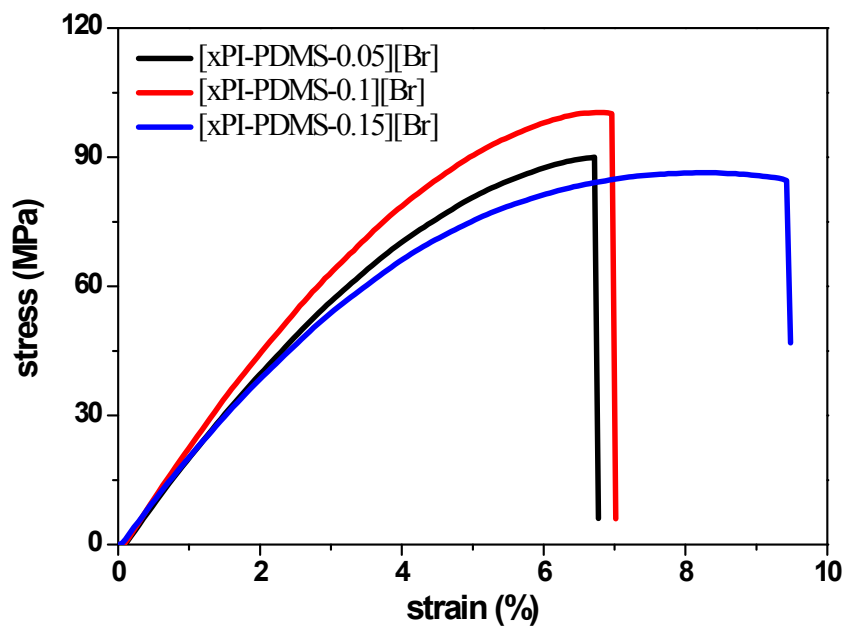

**Figure S7.** Stress-strain behavior of the [xPI-PDMS-0.05][Br], [xPI-PDMS-0.10][Br], and [xPI-PDMS-0.15][Br] membranes
